# Supplementary material
Source: PubMed Central journal article supplement (PMC8415171)

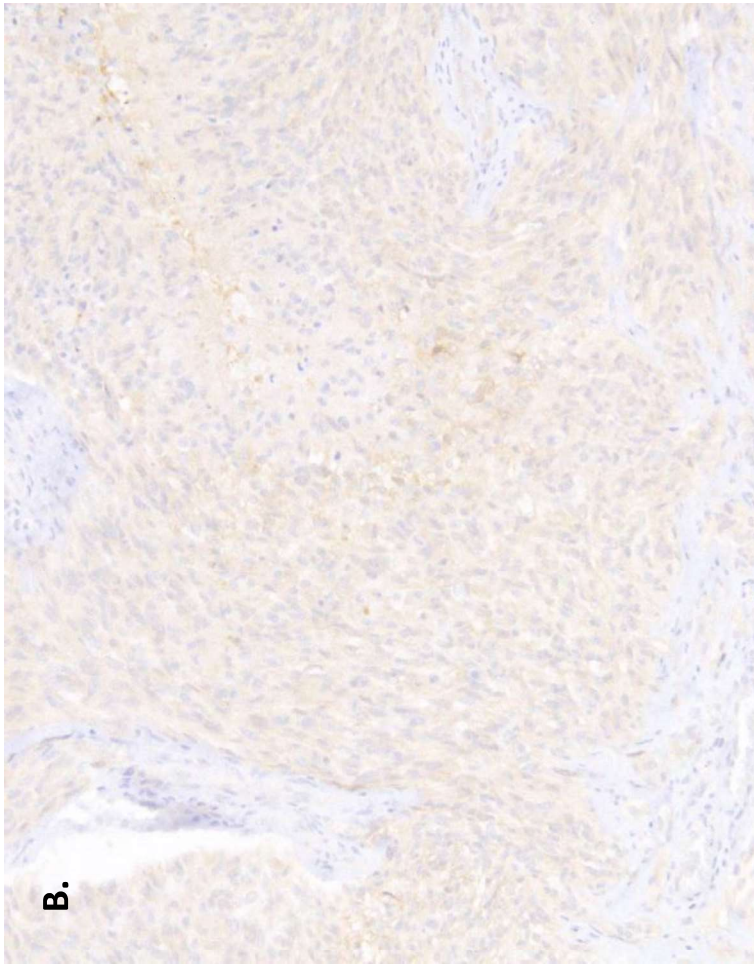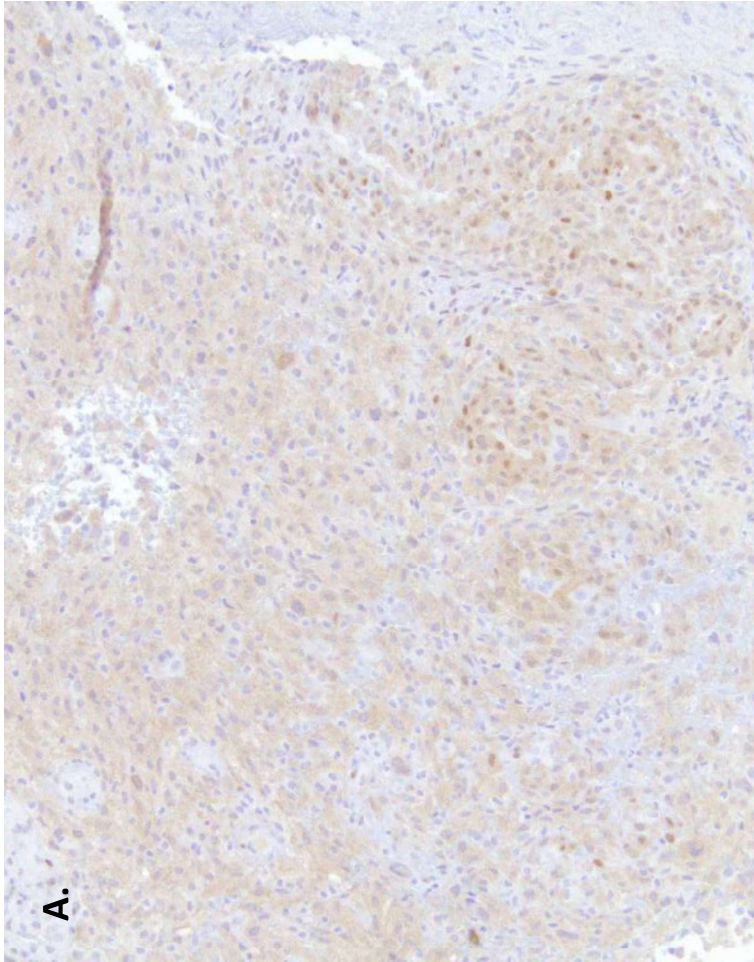

Supplement: NIHMS1736217-supplement-Supplemental_figure.pdf [file NIHMS1736217-supplement-Supplemental_figure.pdf]
